# Supplementary material for: A facile route towards PDMAEMA homopolymer amphiphiles
Source: Royal Society of Chemistry journal article supplement (doi:10.1039/c7sm00365j), 2017-01-01
Supplement: c7sm00365j1.pdf [file c7sm00365j1.pdf]

## SUPPORTING INFORMATION

### A facile route towards PDMAEMA homopolymer amphiphiles

Theodore Manouras,<sup>a,\*</sup> Eleftherios Koufakis,<sup>a,b</sup> Spiros H. Anastasiadis,<sup>a,c</sup> and Maria  
Vamvakaki<sup>a,b,\*</sup>

- Institute of Electronic Structure and Laser, Foundation for Research and Technology – Hellas,  
711 10 Heraklion Crete, GREECE
- Department of Materials Science and Technology, University of Crete, 710 03 Heraklion  
Crete, GREECE
- Department of Chemistry, University of Crete, 710 03 Heraklion Crete, GREECE

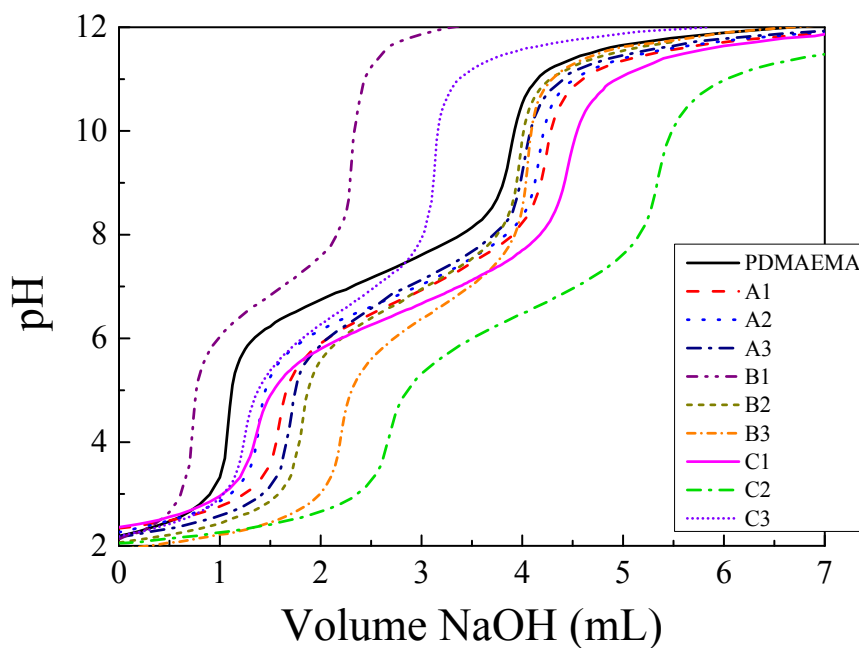

**Figure S1.** Titration curves for 1.0 wt % aqueous solutions of the PDMAEMA homopolymer and the PDMAEMA-co-PQDMAEMA random copolymers.

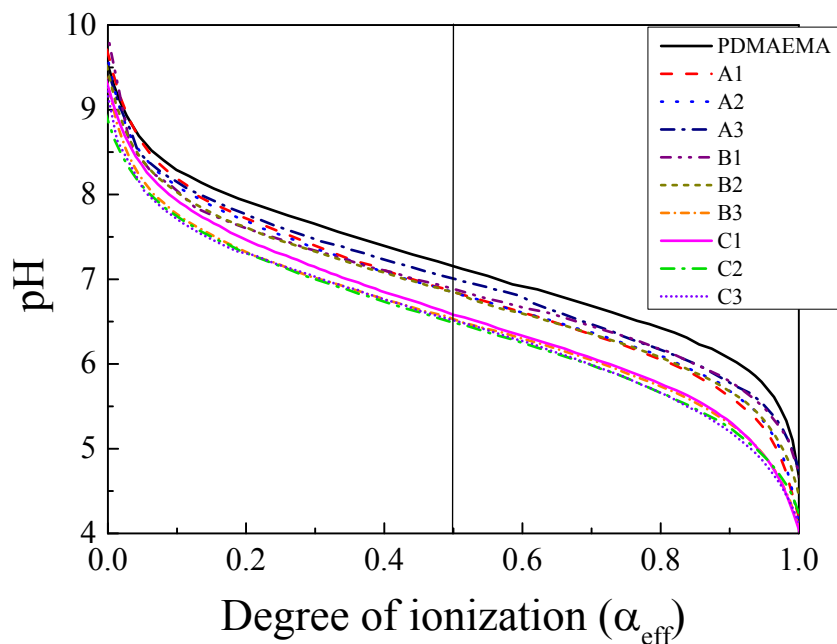

**Figure S2.** Solution pH vs degree of ionization,  $\alpha_{\text{eff}}$ , for the PDMAEMA homopolymer (black line) and the PDMAEMA-*co*-PQDMAEMA random copolymers.

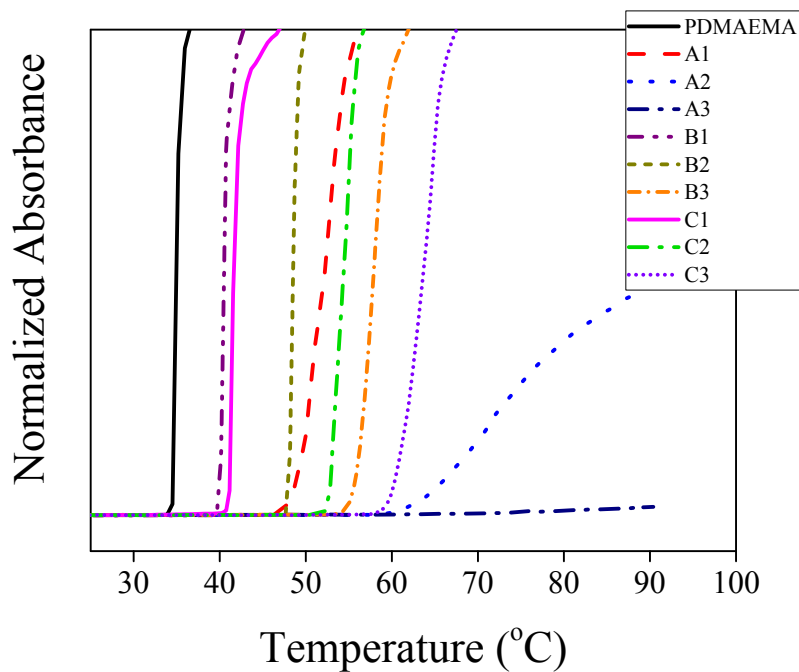

**Figure S3.** Absorbance (at 650 nm) vs temperature for 1.0 wt % aqueous solutions of the PDMAEMA homopolymer and the PDMAEMA-*co*-PQDMAEMA random copolymers at  $\alpha_{\text{eff}} = 0$ .

**Table S1.** pH values at degree of ionization equal to one and zero and effective  $pK_{\alpha}$  values for the PDMAEMA homopolymer (black line) and the PDMAEMA-*co*-PQDMAEMA random copolymers

| <b>Polymer</b> | <b>pH (<math>\alpha_{\text{eff}} = 1</math>)</b> | <b>pH (<math>\alpha_{\text{eff}} = 0</math>)</b> | <b>Effective <math>pK_{\alpha}</math> (<math>\alpha_{\text{eff}} = 0.5</math>)</b> |
|----------------|--------------------------------------------------|--------------------------------------------------|------------------------------------------------------------------------------------|
| <b>PDMAEMA</b> | 4.6                                              | 9.5                                              | 7.1                                                                                |
| <b>A1</b>      | 4.2                                              | 9.7                                              | 6.8                                                                                |
| <b>A2</b>      | 4.1                                              | 9.6                                              | 6.8                                                                                |
| <b>A3</b>      | 4.7                                              | 9.5                                              | 7.0                                                                                |
| <b>B1</b>      | 4.7                                              | 9.7                                              | 6.9                                                                                |
| <b>B2</b>      | 4.4                                              | 9.4                                              | 6.9                                                                                |
| <b>B3</b>      | 4.1                                              | 9.3                                              | 6.5                                                                                |
| <b>C1</b>      | 4.0                                              | 9.3                                              | 6.6                                                                                |
| <b>C2</b>      | 4.2                                              | 8.9                                              | 6.5                                                                                |
| <b>C3</b>      | 4.1                                              | 9.2                                              | 6.5                                                                                |
